# Supplementary material for: Mapping allergenic pollen vegetation in UK to study environmental exposure and human health
Source: PubMed Central journal article supplement — Sci Total Environ. 2017 Dec 1;599-600:483–99. doi: 10.1016/j.scitotenv.2017.04.136 (PMC5593151; doi:10.1016/j.scitotenv.2017.04.136), 2017-12-01
Supplement: mmc1.pdf [file mmc1.pdf]

## Appendix A. Supplementary material

### Appendix A.1. Supplementary Figures

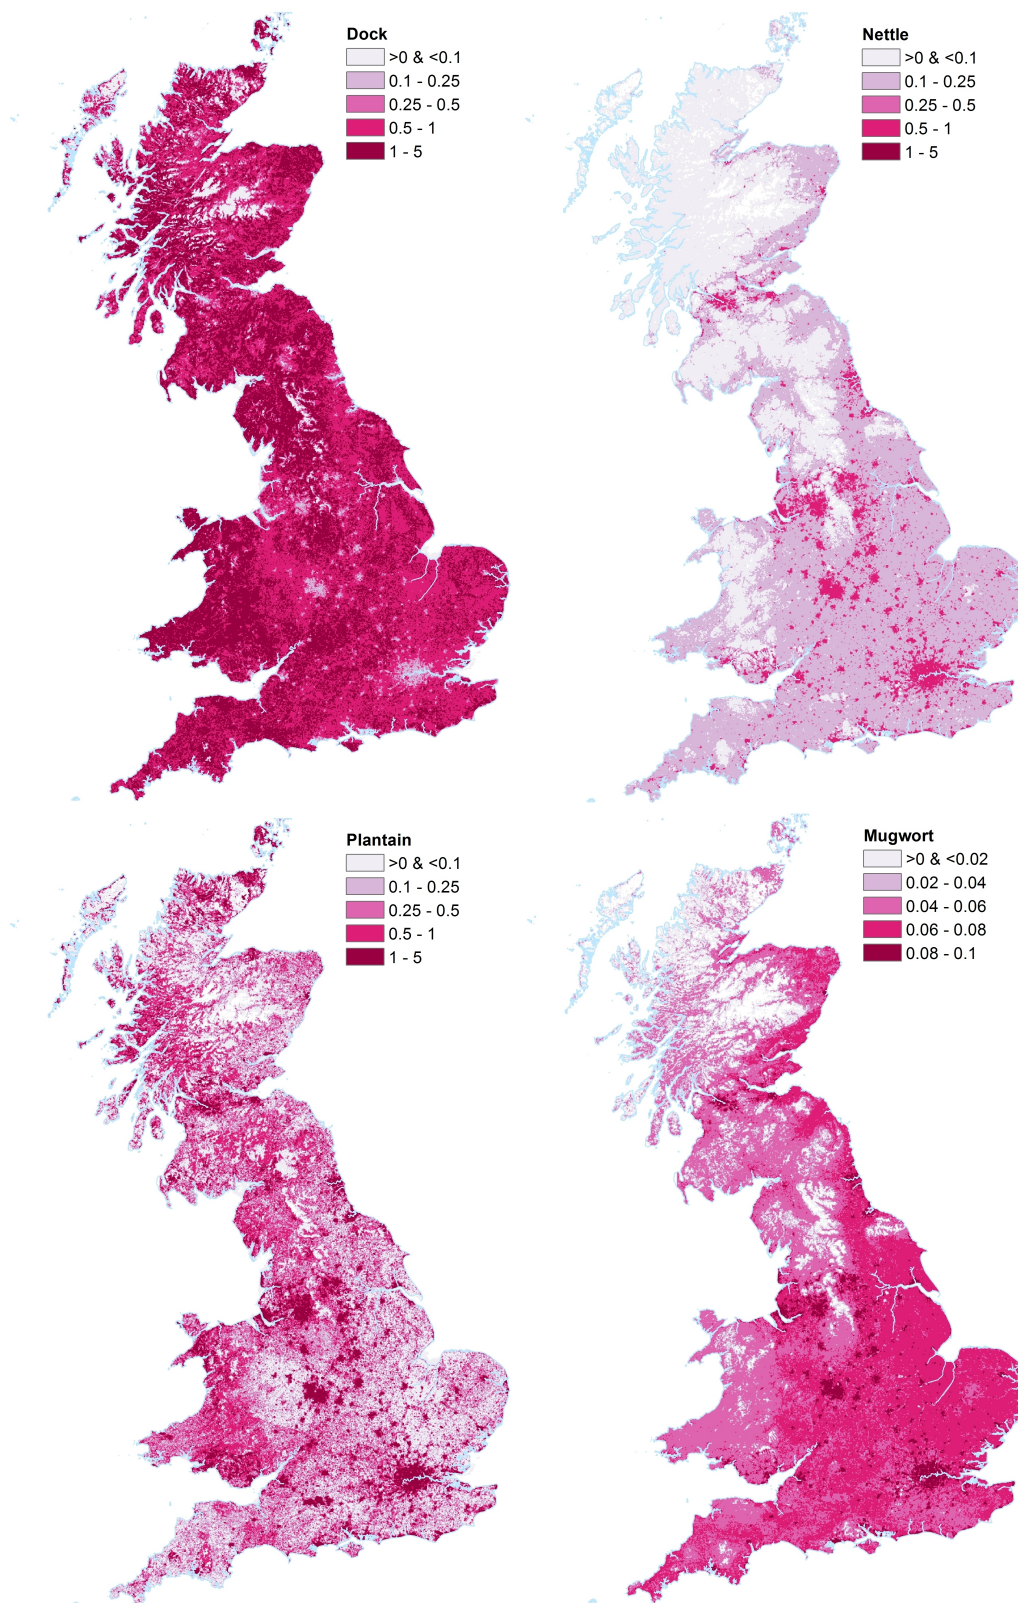

Figure A.8: Maps showing location of four weeds in Great Britain, in units of percentage cover per  $1 \text{ km} \times 1 \text{ km}$  grid box. *Top left*: percentage cover of *Rumex* (dock, sorrels); *Top right*: percentage cover of *Urtica* (nettle); *Bottom left*: percentage cover of *Plantago* (plantain); *Bottom right*: percentage cover of *Artemisia* (mugwort). Images Crown Copyright, 2016, The Met Office. Based on digital spatial data licensed from the Centre for Ecology & Hydrology, copyright NERC (CEH).

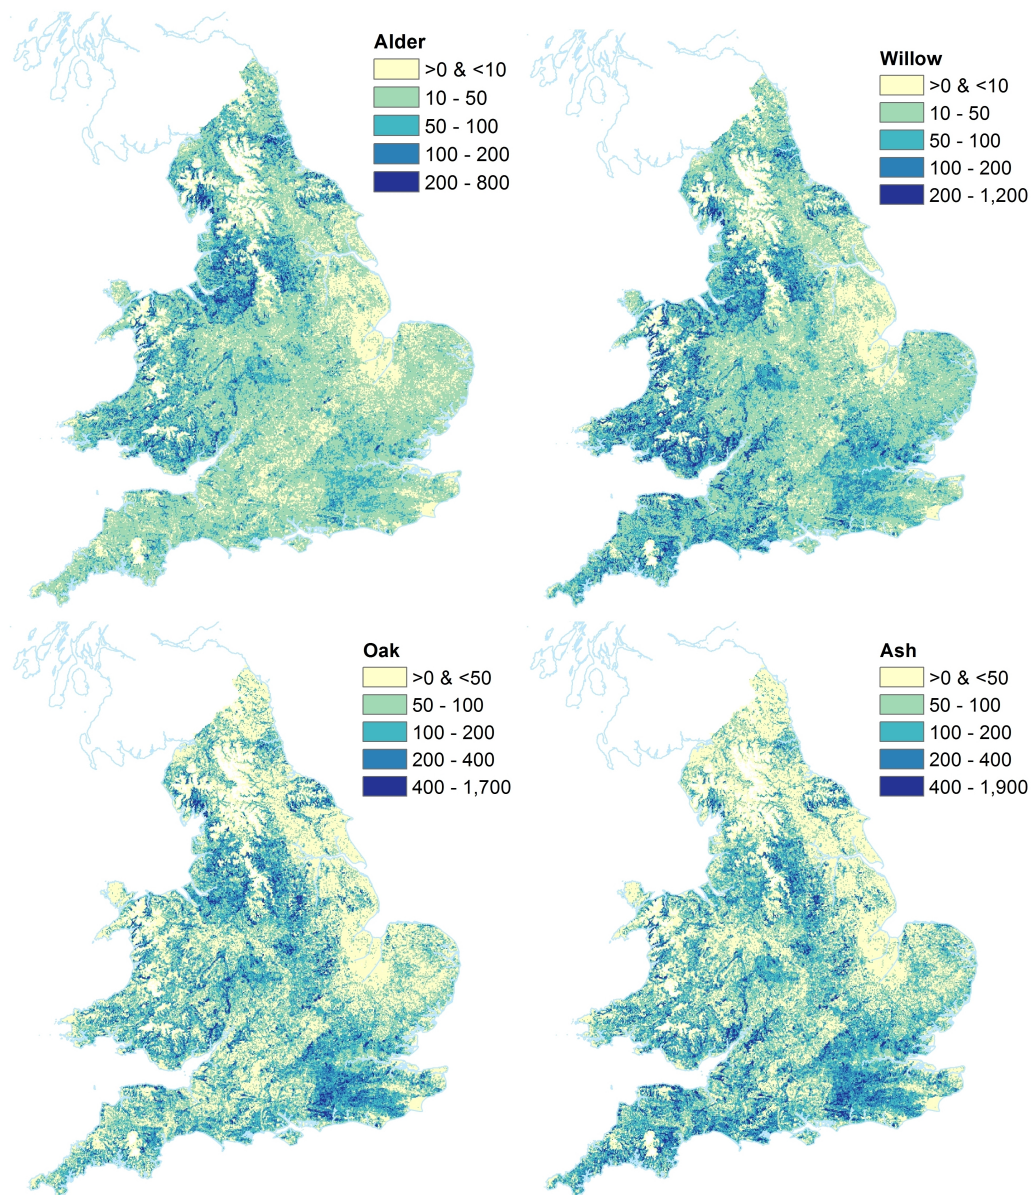

Figure A.9: Maps showing location of tree taxa in England and Wales. Units are number of trees per 1 km  $\times$  1 km grid square. Note that absolute values for each taxon are different, see ranges on each colourbar. Tree locations of *Top left Alnus* (alder); *Top right Salix* (willow); *Bottom left Quercus* (oak); *Bottom right Fraxinus* (ash). Images Crown Copyright, 2016, The Met Office. Based on data licensed from National Tree Map, Copyright Bluesky International Limited, 2016; digital spatial data licensed from the Centre for Ecology & Hydrology, copyright NERC (CEH); and contains, or is based on, information supplied by the Forestry Commission.

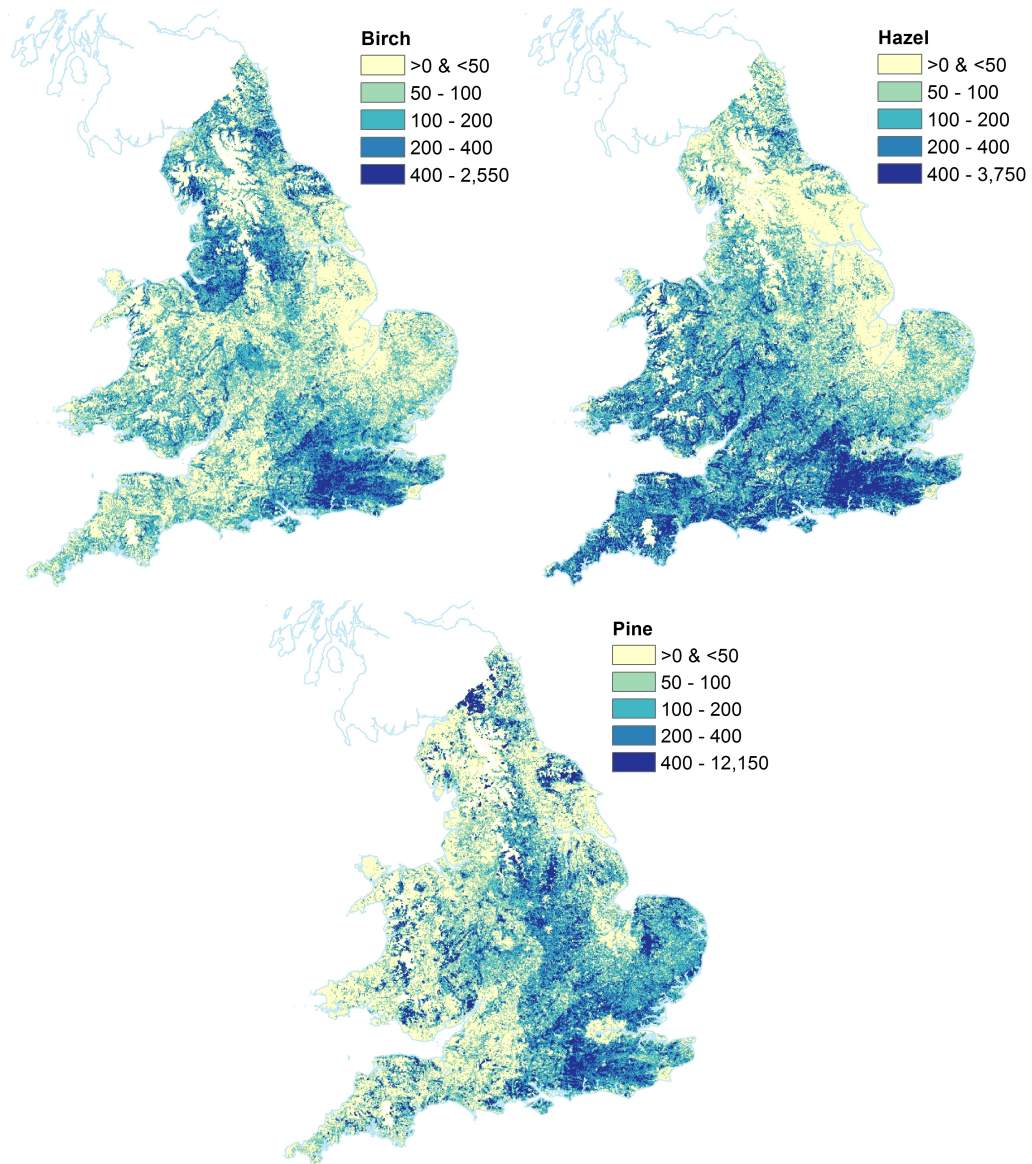

Figure A.10: Maps showing location of tree taxa in England and Wales. Units are number of trees per 1 km  $\times$  1 km grid square. Note that absolute values for each taxon are different, see ranges on each colourbar. Tree locations of *Top left Betula* (birch); *Top right Corylus* (hazel); *Bottom Pinus* (pine). Images Crown Copyright, 2016, The Met Office. Based on data licensed from National Tree Map, Copyright Bluesky International Limited, 2016; digital spatial data licensed from the Centre for Ecology & Hydrology, copyright NERC (CEH); and contains, or is based on, information supplied by the Forestry Commission.
